# Supplementary material for: Signatures of transposon-mediated genome inflation, host specialization, and photoentrainment in Entomophthora muscae and allied entomophthoralean fungi
Source: eLife. 2024 May 20;12:RP92863. doi: 10.7554/eLife.92863 (PMC11105155; doi:10.7554/eLife.92863)
Supplement: Supplementary file 1. — (a) Variance in predicted gene models using different annotation pipelines does not explain the large gene count predicted in the E. muscae genome. (b) Summary of fungal isolates and data used in this manuscript. (c) Information about strains used in phylogenetic and morphologic studies (related to Figure 6). (d) SRA accession numbers of E. muscae RNAseq data (NCBI GSE111046) used for pooled expression analysis (related to Figure 3). [file elife-92863-supp1.xlsx]

## Sheet: 1a
Species	Gene models - original pipeline	Gene models - funannotate pipeline
Entomophaga maimaiga	14,701*	23807
Z. radicans	14,479**	18761
M. cicadina	N/A	7532
*FilteredModels3, per https://mycocosm.jgi.doe.gov/Entmai1/Entmai1.info.html
**FilteredModels2, per https://mycocosm.jgi.doe.gov/Zoorad1/Zoorad1.info.html

## Sheet: 1b
	Panel description							Genome stats	Protein BUSCO	Genome size	TE composition	TE divergence	RIP analysis	DNA methylase tree	RNAi pathway analysis	Domain analysis	Orthogroup analysis	trehalase expansion	additional gene family expansion	antiSMASH	Unique to E. muscae	Orthogroup analysis	Heterozygosity assessment	Pfam analysis, E. muscae transcriptome	Domain analysis (MEROPS, CAZy)	Core OG enrichment (E. muscae)	Enriched CAZy, MEROPS domains absent in E. muscae
	Species	Phylum	Order	Isolate ID	Data type	BioProject	Genome Accession #	1B	1D	2A, B	2C	2D	2E	2F	2G	3A-D	3E-G	4A	4B	4C	5A-B	5C-D	1-S1	3-S1	3-S2	3-S3	5-S1
Core set	Entomophthora muscae	Zoopagomycota	Entomophthorales	ARSEF 13514	Genome	PRJNA479887	GCA_014839935.2	X	X	X	X	X	X	X	X	X	X	X	X	X	X	X	X	X	X	X	X
	Entomophaga maimaiga	Zoopagomycota	Entomophthorales	ARSEF 7190	Genome	PRJNA346853	(JGI)		X	X	X	X	X	X	X	X	X	X	X	X	X	X		X	X	X	X
	Massaspora cicadina	Zoopagomycota	Entomophthorales	MCPNR19 (ARSEF 14555)	Genome	PRJNA795459	GCA_022478985.1		X	X	X	X	X
	Pandora formicae	Zoopagomycota	Entomophthorales	N/A	Transcriptome	PRJNA275046	GCRV00000000.1		X							X			X		X			X	X		X
	Strongwellsea castrans	Zoopagomycota	Entomophthorales	HHDFL040913-1 (DrSc1f)	Transcriptome	PRJEB65897	(in progress)		X							X		X	X		X			X	X		X
	Zoophthora radicans	Zoopagomycota	Entomophthorales	ATCC 208865	Genome	PRJNA196082	(JGI - in Progress)		X	X	X	X	X	X	X	X	X	X	X	X	X	X		X	X	X	X
	Neoondiobolus thromboides	Zoopagomycota	Entomophthorales	FSU 785	Genome	PRJNA196084	GCA_025603075.1		X	X	X	X		X	X	X	X	X	X	X	X	X		X	X	X	X
	Conidibolus coronatus	Zoopagomycota	Entomophthorales	NRRL 28638	Genome	PRJNA67455	GCA_001566745.1		X	X						X		X	X	X	X			X	X		X
	Basidiobolus meristosporus	Zoopagomycota	Basidiobolales	CBS 931.37	Genome		1015486(JGI Mycocosm Proj. ID)			X								X	X
	Neurospora crassa	Ascomycota	Sordariales	OR74A	Genome		GCF_000182925.2			X			X	X
	Austropuccinia psidii	Basidiomycota	Pucciniales	Au_3	Genome		GCA_902702905.1			X			X
	Beauveria bassiana	Ascomycota	Hypocreales	ARSEF 2860	Genome		GCF_000280675.1			X									X	X
	Metarhizium robertsii	Ascomycota	Hypocreales	ARSEF 23	Genome		GCF_000187425.2			X									X	X
	Ophiocordyceps caponoti-floridani	Ascomycota	Hypocreales	EC05	Genome		GCA_012980515.1			X										X
	Ophiocordyceps unilateralis	Ascomycota	Hypocreales	SC16a	Genome		GCA_001272575.2			X										X
	Syncephalis fuscata	Zoopagomycota	Mucorales	S228	Genome	PRJNA332249	1089077 (JGI Mycocosm Proj. ID)			X
	Syncephalis plumigaleata	Zoopagomycota	Zoopagales	NRRL S24	Genome	PRJNA332252	1085189 (JGI Mycocosm Proj. ID)			X									X
	Thamnocephalis sphaerospora	Zoopagomycota	Zoopagales	RSA 1356	Genome		1090756 (JGI Mycocosm Proj. ID)			X									X
	Piptocephalis tieghemiana	Zoopagomycota	Zoopagales	RSA 1565	Genome		1185347 (JGI Mycocosm Proj. ID)			X									X
	Syncephalis pseudoplumigaleata	Zoopagomycota	Zoopagales	Benny S71-1	Genome		1070675 (JGI Mycocosm Proj. ID)			X									X
	Piptocephalis cylindrospora	Zoopagomycota	Zoopagales	RSA2659	Genome		1019821 (JGI Mycocosm Proj. ID)			X									X
	Ramicandelaber brevisporus	Zoopagomycota	Ramicandelaberales	CBS 109374	Genome		1040173(JGI Mycocosm Proj. ID)			X									X
	Martensiomyces pterosporus	Zoopagomycota	Kickxellales	CBS 209.56	Genome		1040167(JGI Mycocosm Proj. ID)			X									X
	Dimargaris christalligena	Zoopagomycota	Dimargaritales	RSA 468	Genome		1072966(JGI Mycocosm Proj. ID)			X									X
	Linderina pennispora	Zoopagomycota	Kickxellales	ATCC12442	Genome		1019508(JGI Mycocosm Proj. ID)			X									X
	Coemansia spiralis	Zoopagomycota	Kickxellales	CBS 108938	Genome		1266377(JGI Mycocosm Proj. ID)			X									X
	Kickxella alabastrina	Zoopagomycota	Kickxellales	RSA 675	Genome		1098907(JGI Mycocosm Proj. ID)			X									X
	Smittium culicis	Zoopagomycota	Harpellales	GSMNP	Genome		GCA_001970855			X									X
	Coemansia mojavensis	Zoopagomycota	Kickxellales	RSA 71	Genome	PRJNA364360	1098727(JGI Mycocosm Proj. ID)			X									X
	Coemansia reversa	Zoopagomycota	Kickxellales	NRRL 1564	Genome	PRJNA68631	1077697(JGI Mycocosm Proj. ID)			X									X
	Smittium mucronatum	Zoopagomycota	Harpellales	ALG-7-W6	Genome		GCA_001953115			X									X
	Zancudomyces culisetae	Zoopagomycota	Harpellales	COL-18-3	Genome		GCA_001969505			X									X
	Metarhizium acridum	Ascomycota	Hypocreales	CQMa 102	Genome		GCA_000187405			X									X
	Clonostachys rosea	Ascomycota	Hypocreales	CBS125111	Genome		1032556(JGI Mycocosm Proj. ID)			X									X
	Cordyceps militaris	Ascomycota	Hypocreales	CM01	Genome		GCA_000225605			X									X
	Acremonium strictum	Ascomycota	Hypocreales	DS1bioAY4a	Genome		1029425(JGI Mycocosm Proj. ID)			X									X
	Trichoderma asperellum	Ascomycota	Hypocreales	CBS 433.97	Genome		1078528(JGI Mycocosm Proj. ID)			X									X
	Trichoderma atroviride	Ascomycota	Hypocreales	B10	Genome		1185329(JGI Mycocosm Proj. ID)			X									X
	Trichoderma citrinoviride	Ascomycota	Hypocreales	TUCIM 6016	Genome		1183960(JGI Mycocosm Proj. ID)			X									X

## Sheet: 1c
Species	Strain ID	Alt. strain IDs	Year	Location	Host species	Host family	ITS	28S (LSU)	Clade	Nuclei No.	Primary conidia length (μm)	Primary conidia width (μm)	References
E. muscae	KVL14-117	---	---	---	Musca domestica	Muscidae	KX639407	OR502659	I	13.8 +- 0.25	27.8 +- 0.45	22.5 +- 0.30	de Fine Licht et al. 2017
E. muscae	ARSEF 6132	Mdom; KVL 99-13	1998	Denmark: Kirke S˚aby, Zealand	Musca domestica	Muscidae	DQ481217	DQ481224	I	16 - 18	---	---	Jensen et al. 2006
E. muscae	ARSEF 6716	KVL 99-95	1999	Denmark: Sverkilde, Zealand	Musca domestica	Muscidae	---	EF392408	I	18.4 +- 0.20 (16.1 - 20.7)	29.0 +- 0.22 (25.2 - 31.5)	23.1 +- 0.17 (21.1 - 25.2)	Jensen et al. 2001
E. muscae	ARSEF 13514	EMB; ivFendel	2015	USA: Berkeley, Alameda County, California	Drosophila hydei	Drosophilidae	OR502655	OR502660	I	13.9 +- 14.9 (8 - 22)	23.5 +- 26.1 (19.2 - 31.8)	18.4-20.5 (14.6 - 26.7)	Elya et al. 2018
E. muscae	ARSEF 6815	KVL 99-102	1999	Denmark: Sengeløse, Zealand	Delia radicum	Anthomyiidae	DQ481218	DQ481225	II	14 - 16	---	---	Jensen et al. 2006
E. muscae	ARSEF 3074	AFTOL-28	1990	USA: Prattsburg, New York	Delia antiqua	Anthomyiidae	AY997047	DQ273772	II	---	---	---	James et al. 2006
E. ferdinandii	ARSEF 6918	KVL 99-92	1999	Denmark: Ørslev, Zealand	Coenosia tigrina	Muscidae	OR502656	OR502661	II	14.6 +- 0.79 (14.5 - 14.9)	25.0 +- 0.87 (24.3 - 25.7)	20.2 +- 0.66 (19.3 - 21.1)	Jensen et al. 2001
E. scatophagae	ARSEF 6704	KVL 00-60	2000	Denmark: Tuse Næs, Zealand	Scatophaga stercoraria	Scathophagidae	DQ481219	DQ481226	II	16 - 18	---	---	Jensen et al. 2006
E. grandis, E. muscae, E. sp.	ARSEF 6701	KVL 00-92	2000	Denmark: Hundested, Zealand	Myospila meditabunda	Muscidae	DQ481222	DQ481229	N/A	20 - 23	---	---	Jensen et al. 2006, Jensen et al. 2009
E. sp.	SoCal cadaver 1	SoCal cadaver 2017	2017	USA: San Jacinto Mountains, California	Drosophila pseudoobscura	Drosophilidae	OR502657	OR502662	N/A	---	---	---	---
E. syrphi	ARSEF 5955 (deposited in NCBI Genbank incorrectly as 5595)	KVL 98-19	1998	Denmark: Zealand	Triglyphus primus	Syrphidae	DQ481223	DQ481230	N/A	17 - 21	---	---	Jensen et al. 2006
E. schizophorae	ARSEF 6137	KVL 99-18	1996	Denmark: Roskilde, Zealand	Musca domestica	Muscidae	DQ481220	DQ481227	N/A	2024-05-07	---	---	Jensen et al. 2006
E. sp.	LTE cadaver 1	2017-08-29-RB	2017	USA: Lake Thomas Edison, California	Drosophila sp.	Drosophilidae	OR502658	---	N/A	---	---	---	---
E. schizophorae	ARSEF 6817	KVL 00-93	2000	Denmark: Hundested, Zealand	Pollenia sp.	Polleniidae	DQ481221	DQ481228	N/A	2024-05-07	---	---	Jensen et al. 2006
Species column lists all known names applied to the strain IDs and/or alternative strain IDs either in published literature and/or in NCBI Genbank.
Clade column lists Entomophthora muscae clades as shown in Figure 6.
Nuclei No., primary conidia length, and primary conidia width columns summarize data from previous publications listed in References column.
For Species, Clade and Nuclei No. columns, all ranges represent minimum and maximum, and those separated with +- are mean and standard deviation. (---) denotes no data are available.
Species IDs are based on ARSEF catalog desinations, NCBI GenBank accession IDs, and/or published literature. In instances where species-level identifications are unresolved or conflicting, all designations are listed.

## Sheet: 1d
Accession	Time_point	Tissue	Treatment
SRR6766803	72 hours	Whole fly	Exposed
SRR6766804	72 hours	Whole fly	Exposed
SRR6766805	72 hours	Whole fly	Exposed
SRR6766806	24 hours	Whole fly	Exposed
SRR6766807	24 hours	Whole fly	Exposed
SRR6766808	24 hours	Whole fly	Exposed
SRR6766809	48 hours	Whole fly	Exposed
SRR6766810	48 hours	Whole fly	Exposed
SRR6766811	48 hours	Whole fly	Exposed
SRR6766812	96 hours	Whole fly	Exposed
SRR6766813	96 hours	Whole fly	Exposed
SRR6766814	96 hours	Whole fly	Exposed
SRR6766815	48 hours	Whole fly	Exposed
SRR6766816	48 hours	Whole fly	Exposed
SRR6766817	48 hours	Whole fly	Exposed
SRR6766818	24 hours	Whole fly	Exposed
SRR6766819	24 hours	Whole fly	Exposed
SRR6766820	72 hours	Whole fly	Exposed
SRR6766821	24 hours	Whole fly	Exposed
SRR6766822	72 hours	Whole fly	Exposed
SRR6766823	72 hours	Whole fly	Exposed
SRR6766824	96 hours	Whole fly	Infected cadaver
SRR6766825	96 hours	Whole fly	Infected cadaver
SRR6766826	96 hours	Whole fly	Infected cadaver
SRR6766827	120 hours	Whole fly	Infected cadaver
SRR6766828	120 hours	Whole fly	Infected cadaver
SRR6766829	120 hours	Whole fly	Infected cadaver
